# Supplementary material
Source: publisher figshare collection journal article supplement (https://acs.figshare.com/ndownloader/files/4291978)
Supplement: Supplementary file 1 [file 4291978]

## SUPPORTING INFORMATION

# Probing Oxygen Activation Sites in Two Flavoprotein Oxidases Using Chloride as an Oxygen Surrogate<sup>†‡</sup>

Phaneeswara-Rao Kommoju<sup>§</sup>, Zhi-wei Chen<sup>¶</sup>, Robert C. Bruckner<sup>§</sup>, F. Scott Mathews<sup>\*||</sup>, and Marilyn Schuman Jorns<sup>\*§</sup>

Department of Biochemistry and Molecular Biology, Drexel University College of Medicine,  
Philadelphia, PA 19102

Department of Biochemistry and Molecular Biology, Saint Louis University School of Medicine,  
St. Louis, MO 63104

Department of Biochemistry and Molecular Biophysics, Washington University School of  
Medicine, St. Louis, MO 63110

\*To whom correspondence and requests for reprints should be addressed. M.S.J.: Phone: (215) 762-7495; FAX: (215) 762-4452; E-mail: [marilyn.jorns@drexelmed.edu](mailto:marilyn.jorns@drexelmed.edu). F.S.M.: Phone (314) 362-1080; FAX: (314) 362-7183; E-mail: [mathews@biochem.wustl.edu](mailto:mathews@biochem.wustl.edu).

Running Title: Probing Oxygen Activation Sites in Flavoprotein Oxidases

| Table S1 Summary of data collection and refinement for GOX |                    |                   |
|------------------------------------------------------------|--------------------|-------------------|
|                                                            | Form A             | Form B            |
| Data collection                                            |                    |                   |
| Wavelength (Å)                                             | 0.9                | 0.9               |
| Space group                                                | P3 <sub>1</sub> 21 | C222 <sub>1</sub> |
| No. molecules per asymmetric unit                          | 1                  | 1                 |
| Res. Range (last shell) (Å)                                | 40-1.3             | 40-1.2            |
| No. observations                                           | 1056927            | 1039740           |
| Unique observations                                        | 132764             | 179408            |
| Completeness (last shell) (%)                              | 99.2(98.7)         | 97.9(97.8)        |
| R <sub>merge</sub> <sup>a</sup> (last shell) (%)           | 5.6(32.1)          | 6.6(28.9)         |
| I/σ(I) <sup>b</sup> (last shell)                           | 29.9(3.6)          | 23.1(4.2)         |
| Refinement                                                 |                    |                   |
| Resolution (Å)                                             | 40-1.3             | 40-1.2            |
| F /σ( F )                                                  | >0                 | >0                |
| R <sub>cryst</sub> <sup>c</sup>                            | 0.180              | 0.178             |
| R <sub>free</sub> <sup>d</sup>                             | 0.198              | 0.188             |
| Reflections (working/test)                                 | 125987/6736        | 169694/8838       |
| Protein atoms                                              | 4452               | 4452              |
| Water molecules                                            | 1010               | 1296              |
| FAD atoms                                                  | 53                 | 53                |
| Cl <sup>-</sup> ions                                       | 1                  | 1                 |
| Rmsd bond lengths <sup>e</sup> (Å)                         | 0.014              | 0.012             |
| Rmsd angles <sup>e</sup> (°)                               | 1.6                | 1.6               |
| Rms ΔB (Å <sup>2</sup> ) (mm/ms/ss) <sup>f</sup>           | 1.28/1.53/2.33     | 1.01/1.36/2.12    |
| <B> protein (Å <sup>2</sup> )                              | 13.7               | 12.2              |
| <B> water molecules (Å <sup>2</sup> )                      | 33.9               | 35.7              |
| <B> FAD (Å <sup>2</sup> )                                  | 9.0                | 8.1               |
| <B> Cl <sup>-</sup> ions (Å <sup>2</sup> )                 | 20.4               | 18.9              |
| Ramachandran plot (%)                                      |                    |                   |
| Allowed region                                             | 99.8               | 99.8              |
| Generously allowed region                                  | 0.2                | 0.2               |
| Disallowed region                                          | 0.                 | 0.0               |

<sup>a</sup>R<sub>merge</sub> =  $\sum_h \sum_i |I_i(h) - \bar{I}(h)| / \sum_h \sum_i I_i(h)$ , where I<sub>i</sub>(h) and  $\bar{I}(h)$  are the ith and mean measurements of reflection h. <sup>b</sup>I/σ(I) is the average signal to noise ratio for merged reflection intensities. <sup>c</sup>R =  $\sum_h |F_o - F_c| / \sum_h |F_o|$ , where F<sub>o</sub> and F<sub>c</sub> are the observed and calculated structure factor amplitudes of reflection h. <sup>d</sup>R<sub>free</sub> is the test reflection data set, about 5 % selected randomly for cross validation during crystallographic refinement. <sup>e</sup>Root-mean-squared deviation (Rmsd) from ideal bond lengths and angles and Rmsd in B-factors of bonded atoms. <sup>f</sup>mm, main chain to main chain; ms, main chain to side chain, ss, side chain to side chain.

Table S2 Effect of pH on the stability of the complex  
formed with GOX and chloride<sup>a</sup>

| pH   | K <sub>d</sub> (mM)    |
|------|------------------------|
| 3.0  | 6.2 ± 0.1              |
| 3.5  | 8.7 ± 0.2              |
| 4.0  | 19.0 ± 0.3             |
| 4.5  | 45 ± 1                 |
| 5.0  | 137 ± 6                |
| 5.5  | 460 ± 20               |
| 5.75 | 630 ± 30               |
| 6.0  | 830 ± 40<br>(900 ± 80) |
| 6.25 | 1130 ± 40              |
| 6.5  | 1640 ± 70              |
| 7.0  | 1900 ± 200             |

<sup>a</sup>Titration were conducted in 50 mM potassium citrate (pH 3.0 to 6.0) or 50 mM potassium phosphate (pH 6.0 to 7.0) buffer at 25 °C. Two titration were performed at pH 6.0. The value shown in parentheses was obtained in phosphate buffer.
